# Supplementary material for: PRC2 Is Dispensablein Vivofor β-Catenin-Mediated Repression of Chondrogenesis in the Mouse Embryonic Cranial Mesenchyme
Source: Oxford University Press journal article supplement (doi:10.1534/g3.117.300311), 2017-12-10
Supplement: 300311_files1.pdf [file 300311_files1.pdf]

Figure S1

A

|                    | <i>Twist1</i>                                     |                                                   | <i>Twist2</i>                                     |                                                   | <i>Apcdd1</i>                                     |                                                   |
|--------------------|---------------------------------------------------|---------------------------------------------------|---------------------------------------------------|---------------------------------------------------|---------------------------------------------------|---------------------------------------------------|
|                    | <i>En1Cre;</i><br><i>β-catenin<sup>fl/+</sup></i> | <i>En1Cre;</i><br><i>β-catenin<sup>fl/Δ</sup></i> | <i>En1Cre;</i><br><i>β-catenin<sup>fl/+</sup></i> | <i>En1Cre;</i><br><i>β-catenin<sup>fl/Δ</sup></i> | <i>En1Cre;</i><br><i>β-catenin<sup>fl/+</sup></i> | <i>En1Cre;</i><br><i>β-catenin<sup>fl/Δ</sup></i> |
| Average FPKM       | 64.32                                             | 23.51                                             | 38.21                                             | 6.65                                              | 45.21                                             | 10.03                                             |
| Standard Deviation | 8.50                                              | 3.36                                              | 4.32                                              | 0.92                                              | 4.46                                              | 2.47                                              |

B

Supraorbital  
cranial  
mesenchyme  
and ectoderm

Dorsal dermal  
fibroblast

## PANTHER Pathway

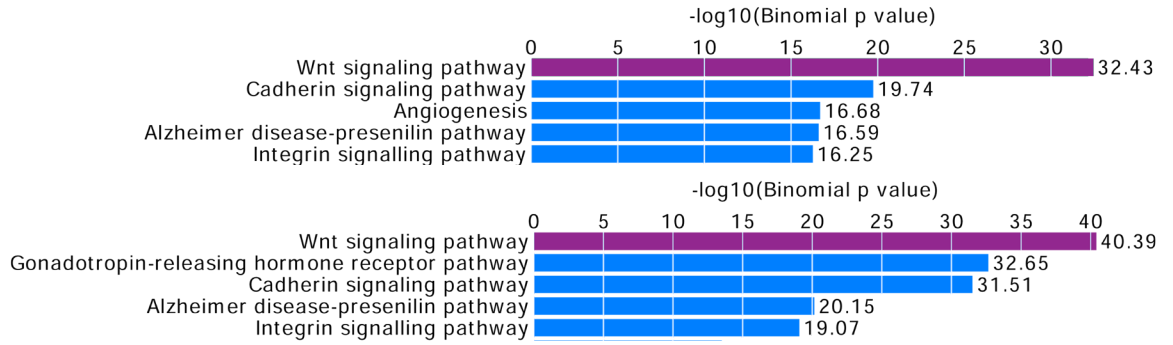

C

Supraorbital  
cranial  
mesenchyme  
and ectoderm

Dorsal dermal  
fibroblast

## MSigDB Pathway

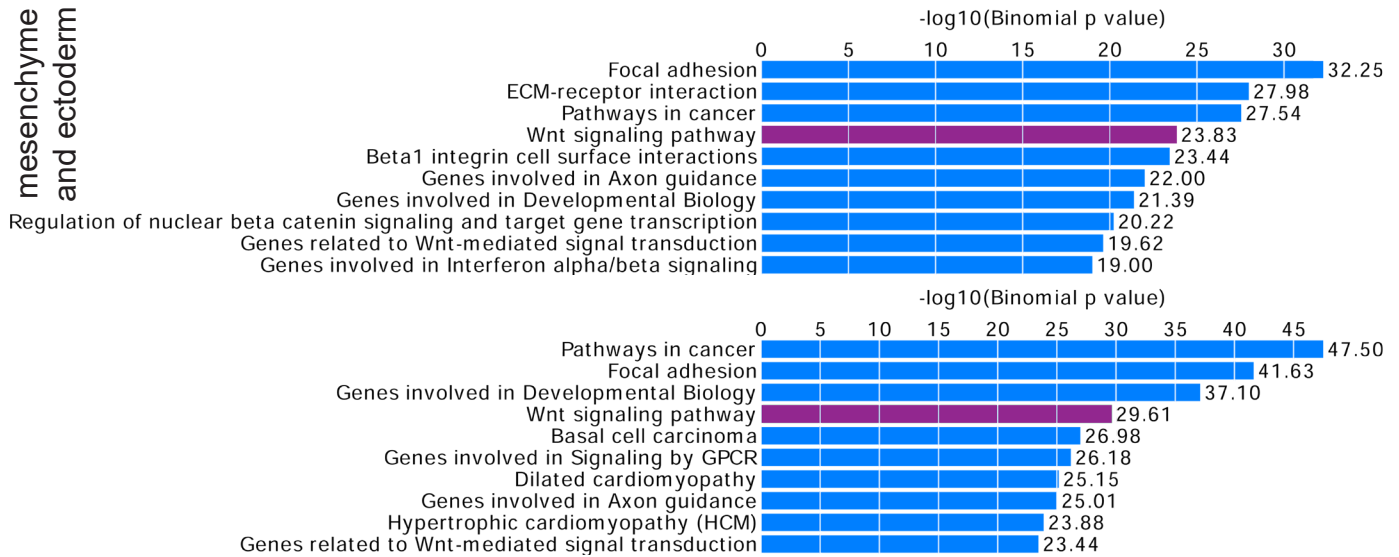

Figure S2

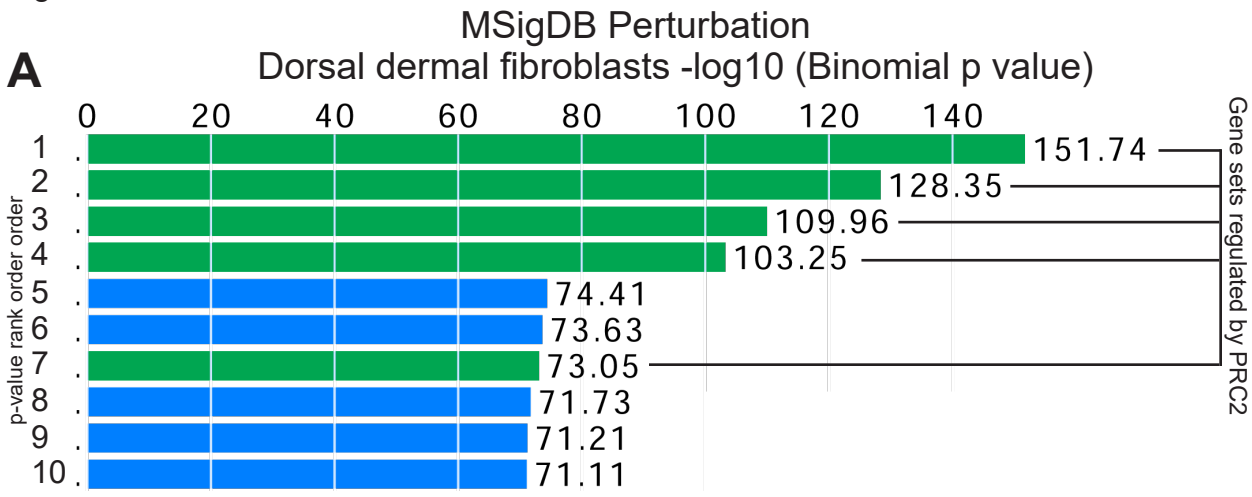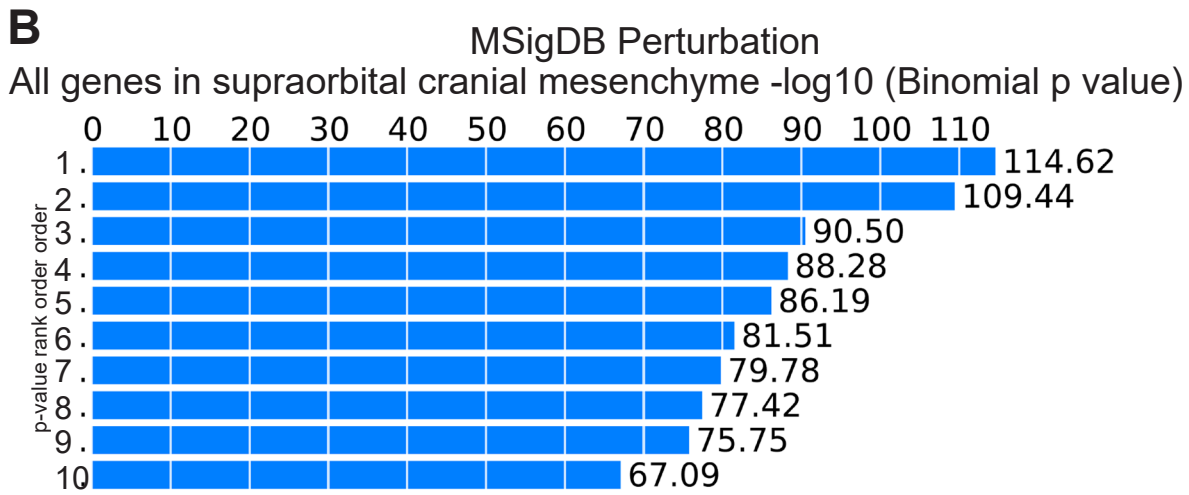

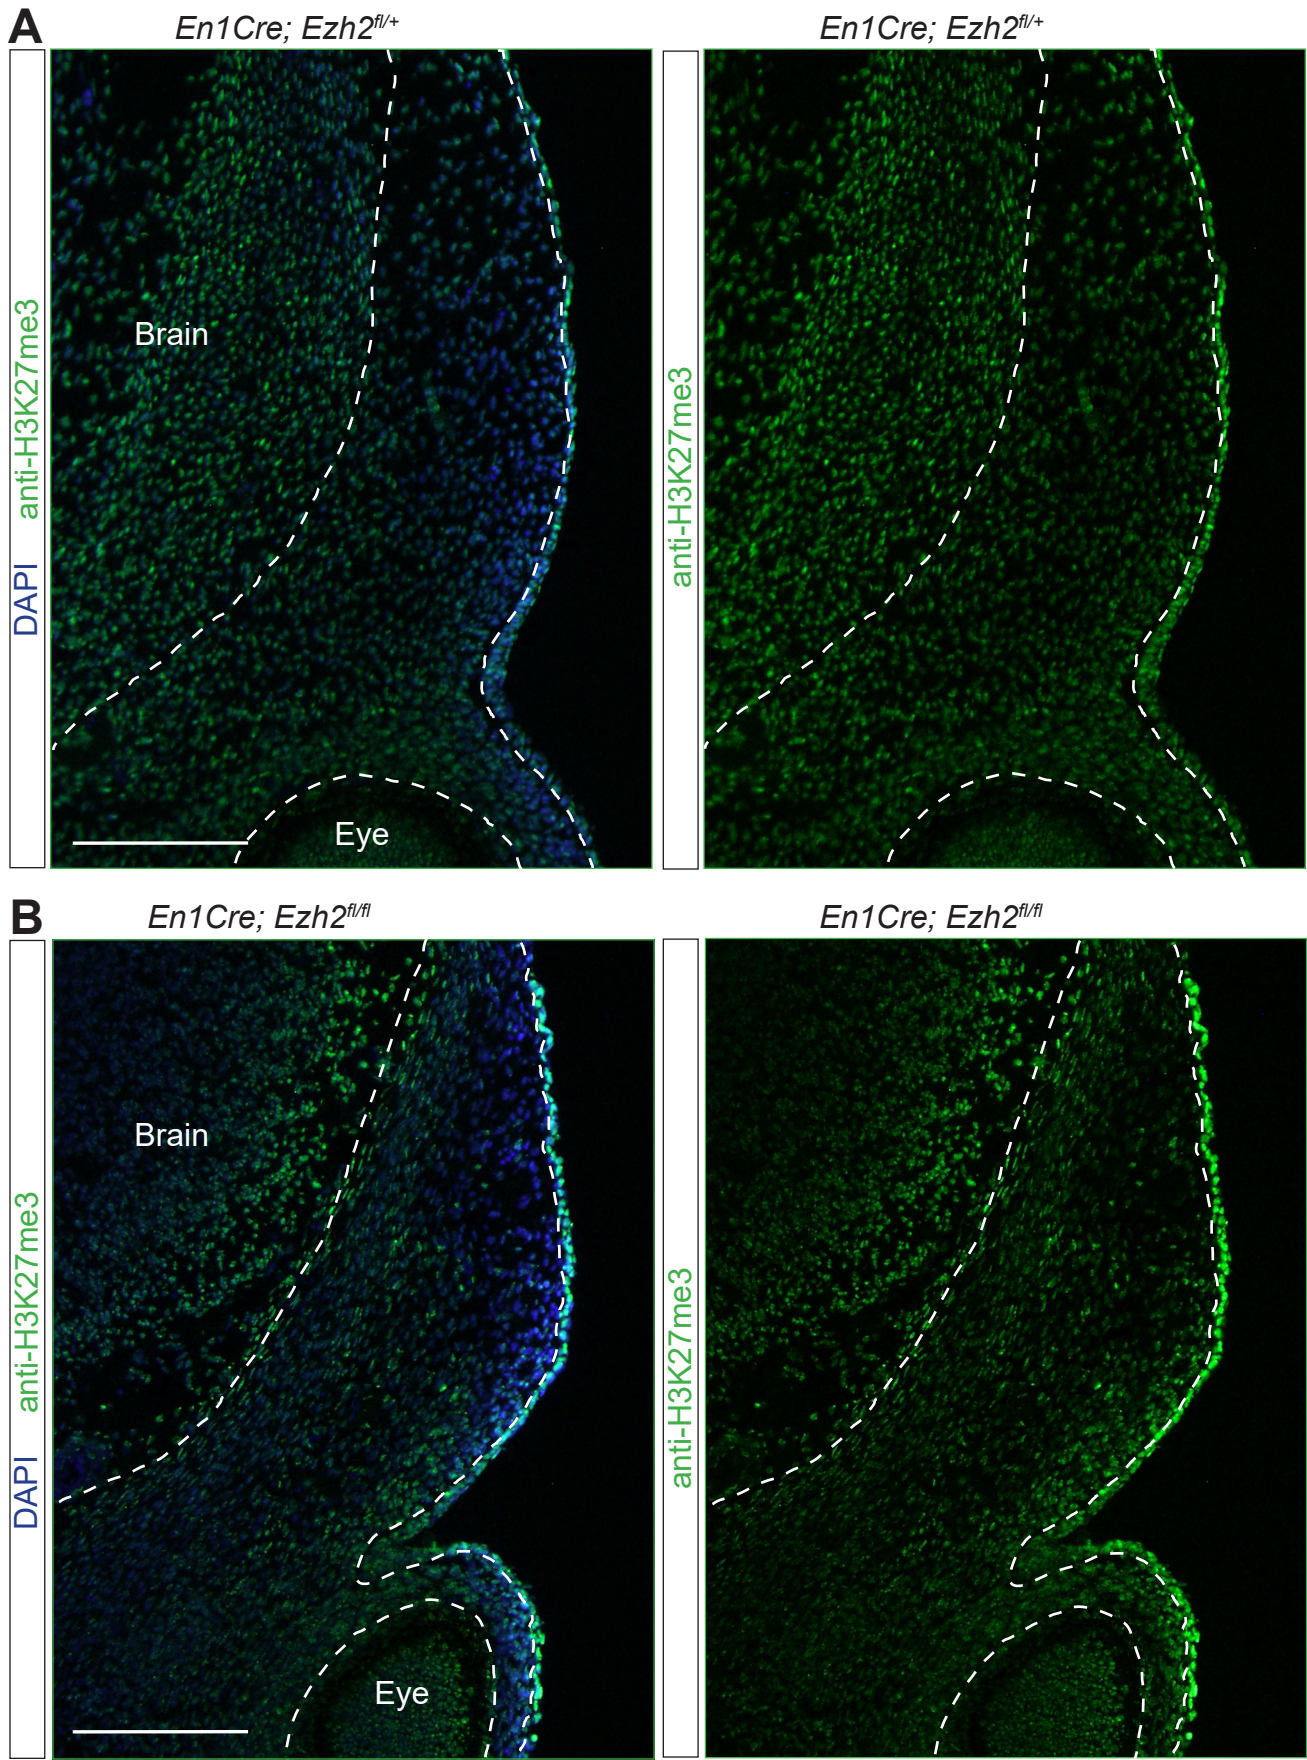

## A Hoxa cluster

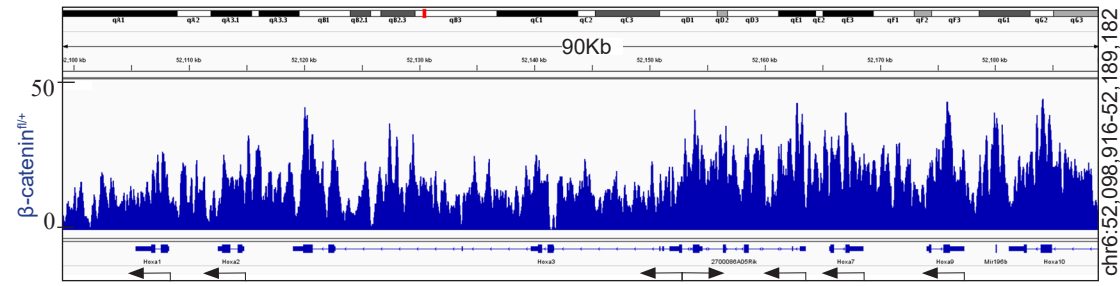

## Sept9

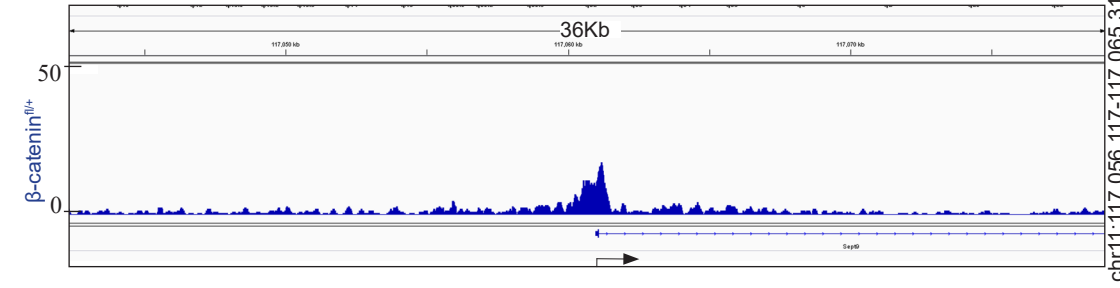

## Lmtk3

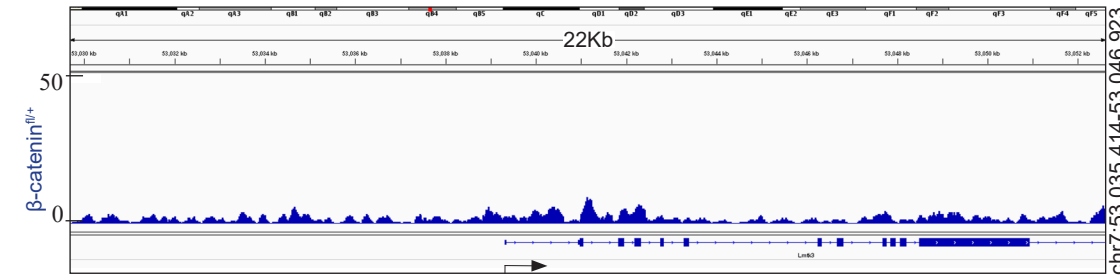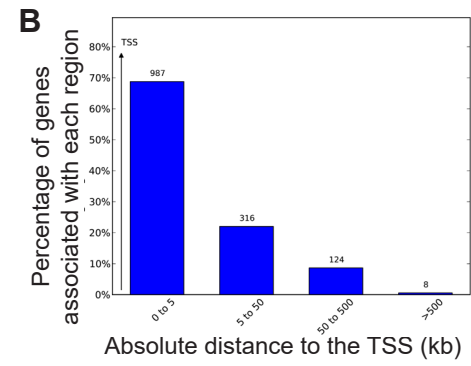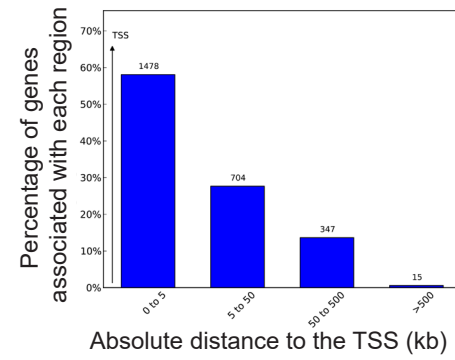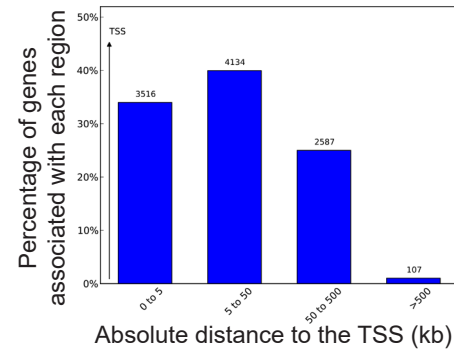

## C

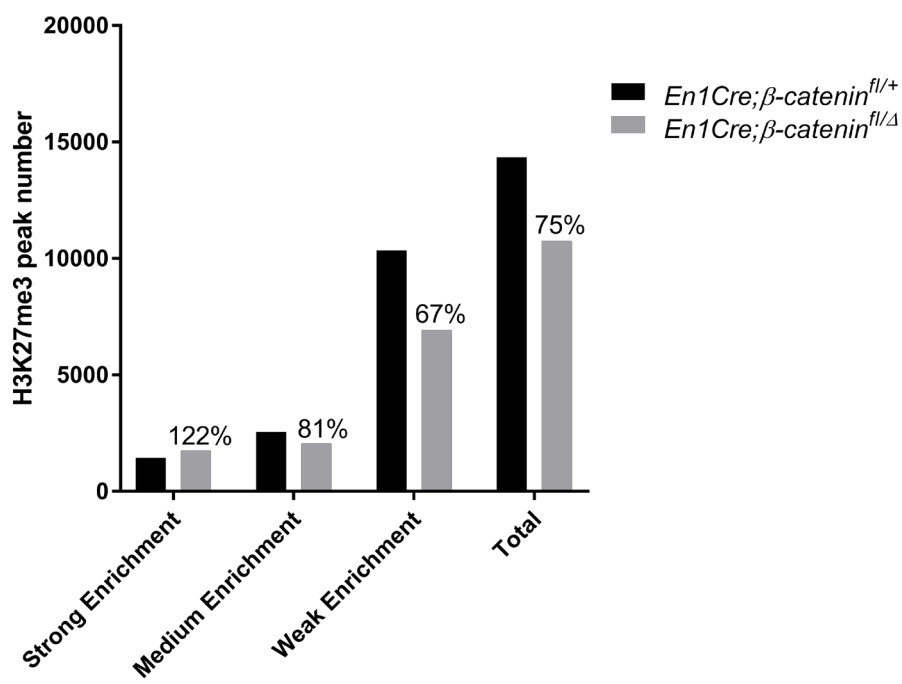



Figure S5

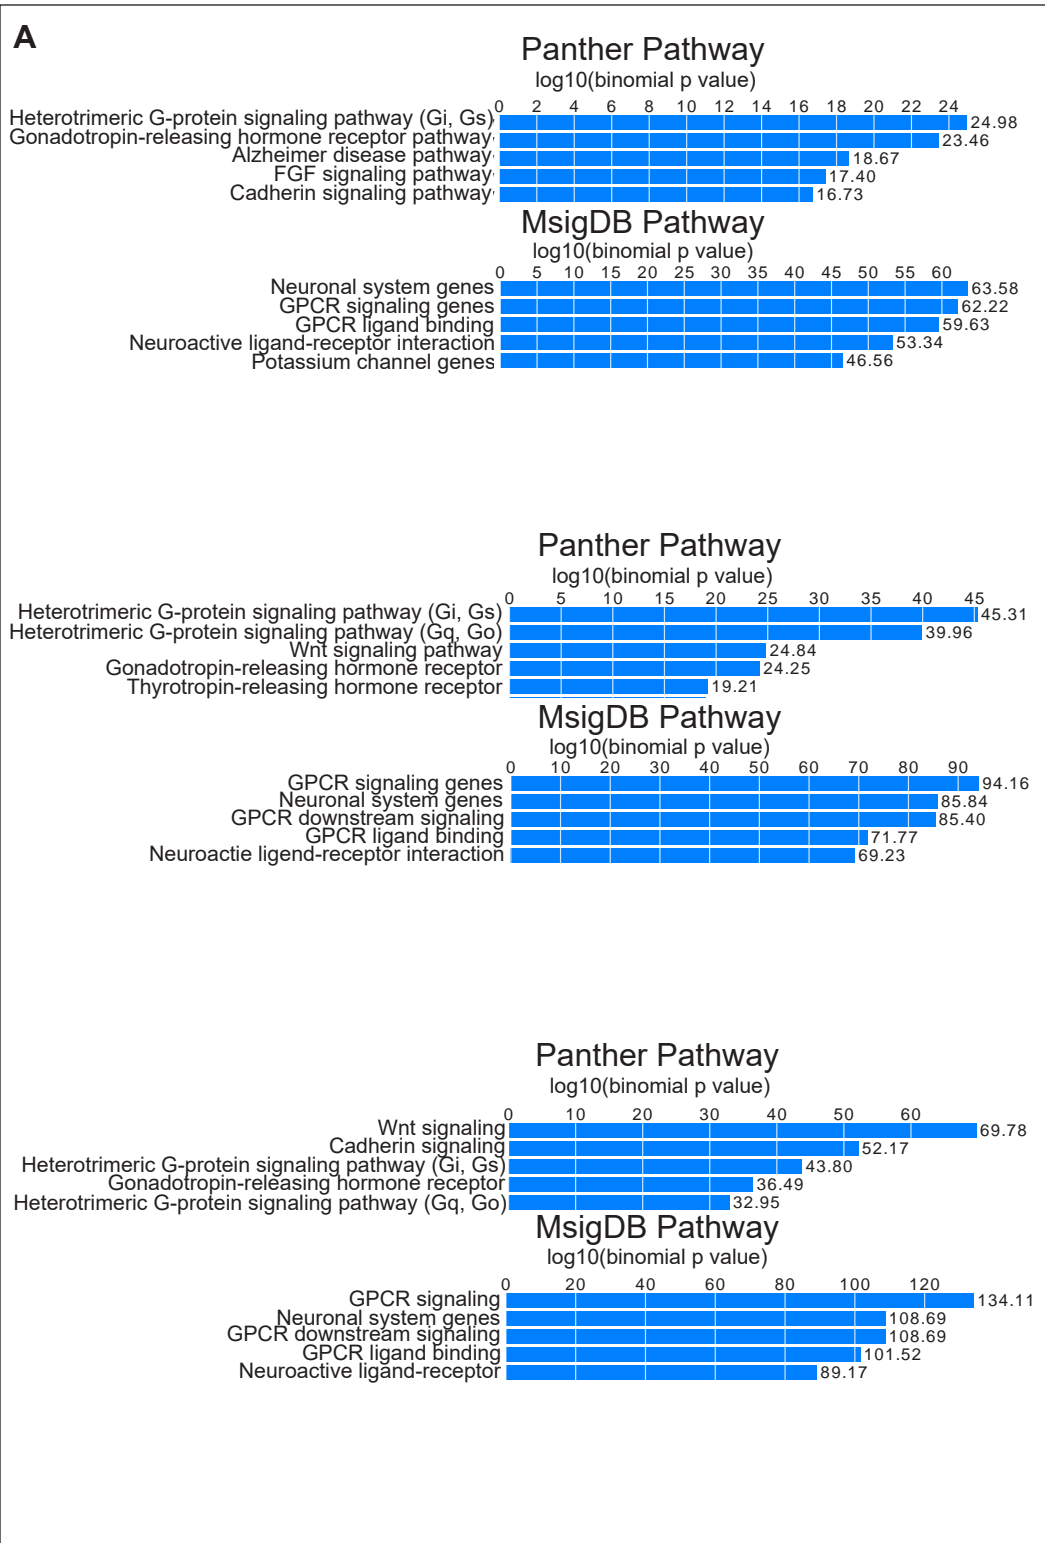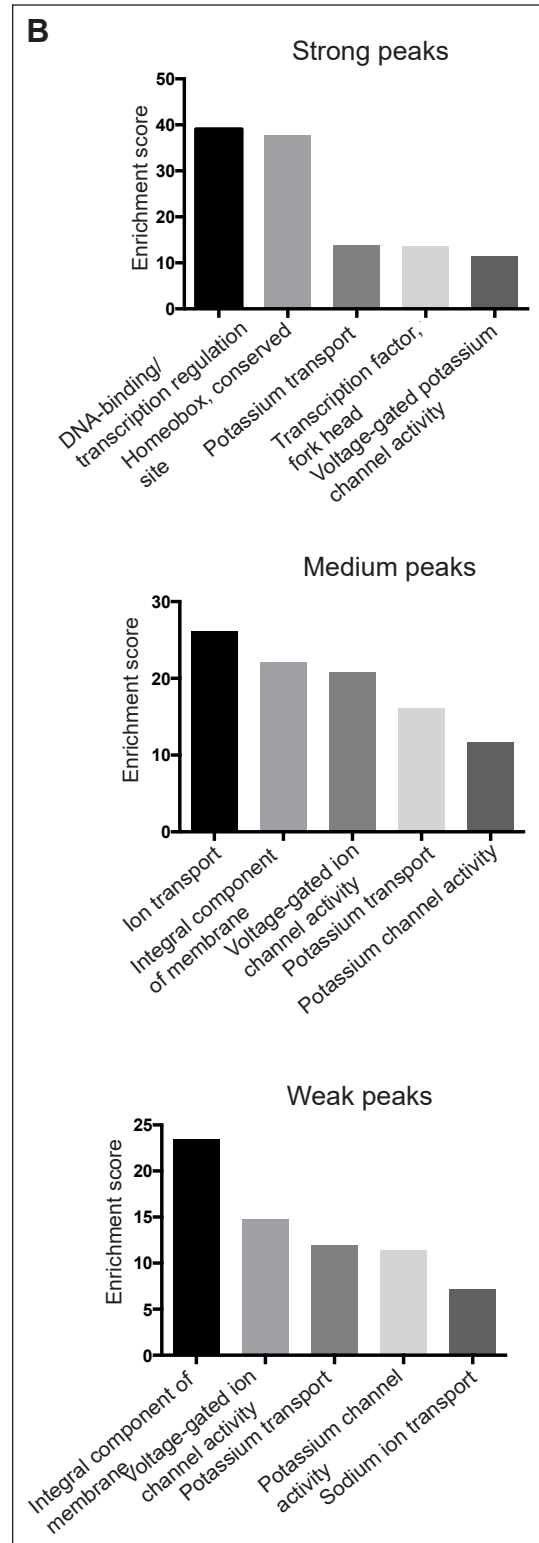

Figure S6

A

| H3K27me3 ChIP sequencing peak strength | Total Associated Genes | Associated with cranial mesenchyme genes >1 FPKM | Percentage | Associated with cranial mesenchyme genes < 1FPKM | Percentage |
|----------------------------------------|------------------------|--------------------------------------------------|------------|--------------------------------------------------|------------|
| Strong Peaks                           | 891                    | 224                                              | 25.14      | 628                                              | 70.48      |
| Medium Peaks                           | 1269                   | 524                                              | 41.29      | 676                                              | 53.27      |
| Weak Peaks                             | 2107                   | 945                                              | 44.85      | 1011                                             | 47.98      |

B

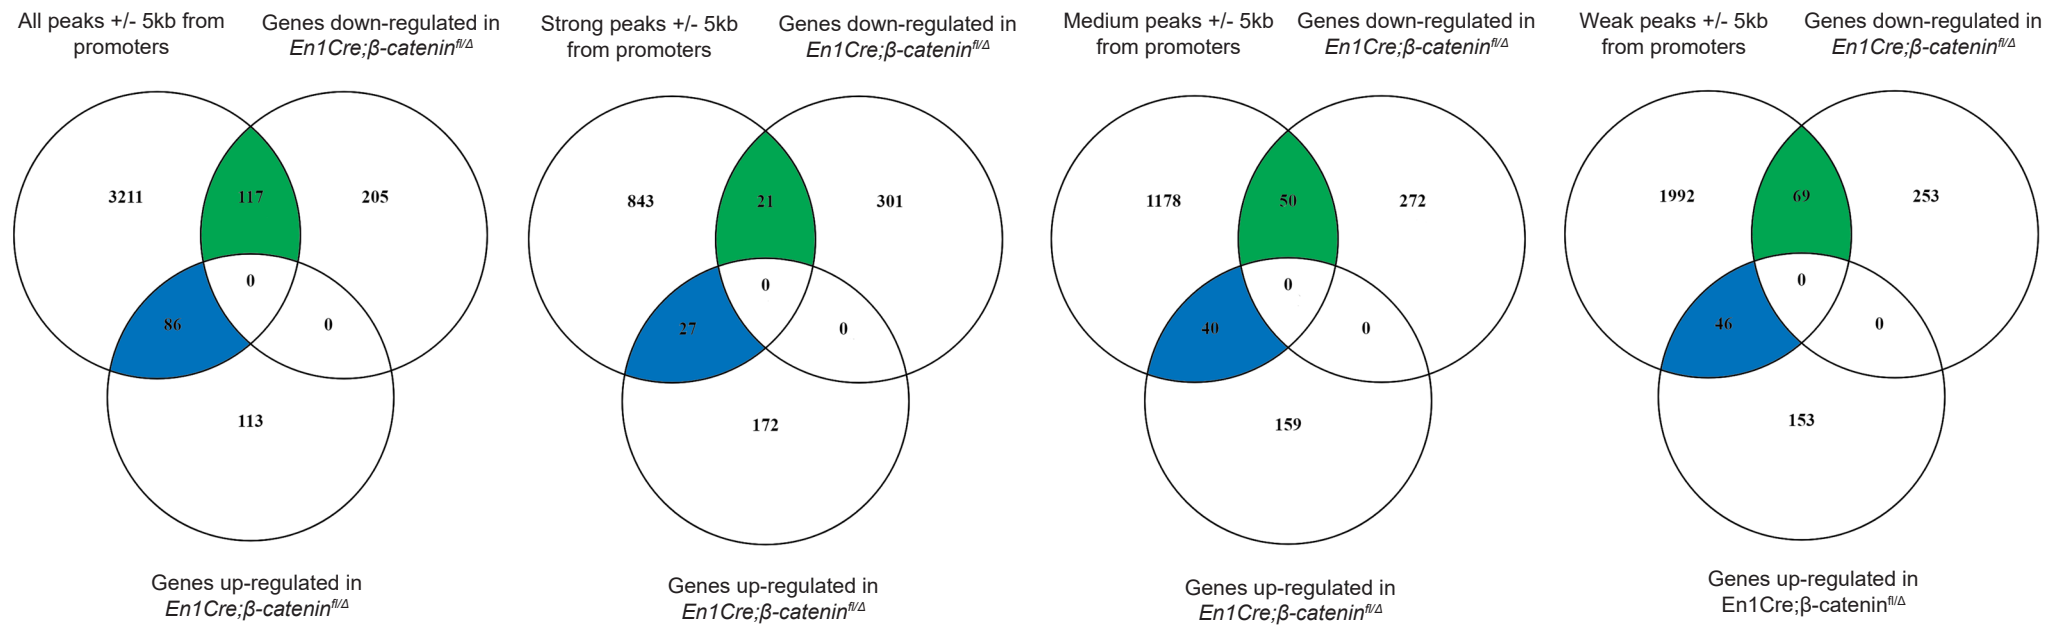

Figure S7

**A** *HoxA* locus

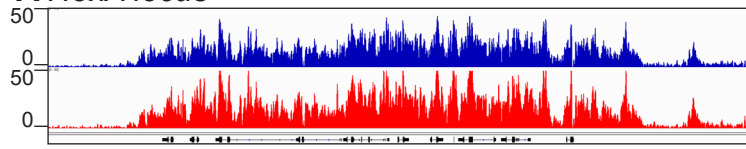

**C** *Lef1*

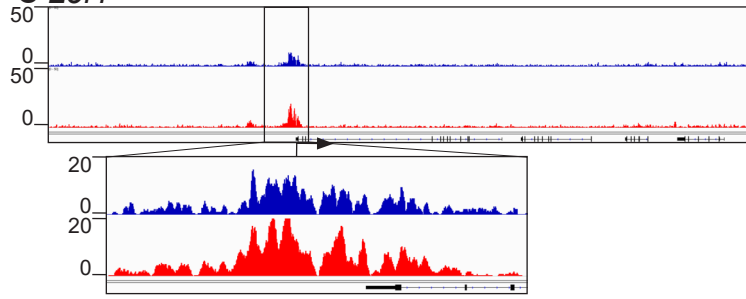

**E** *Twist1*

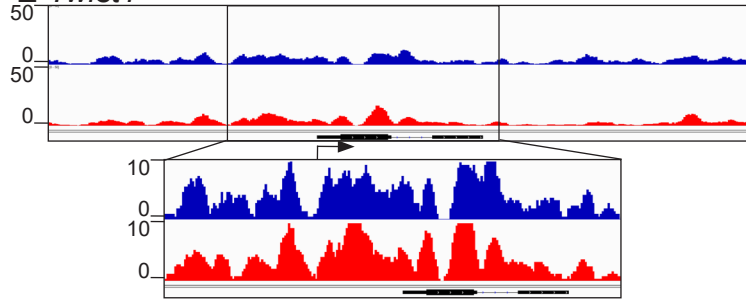

**G** *Runx2*

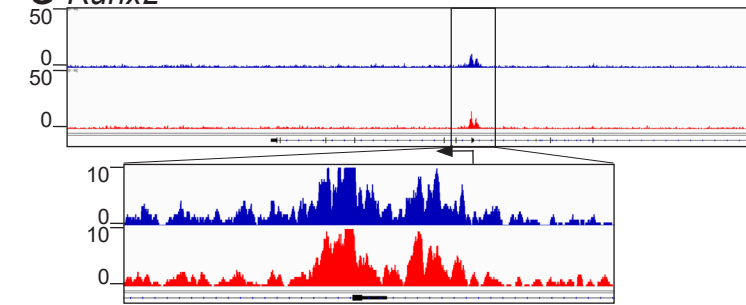

**I** *Col9a2*

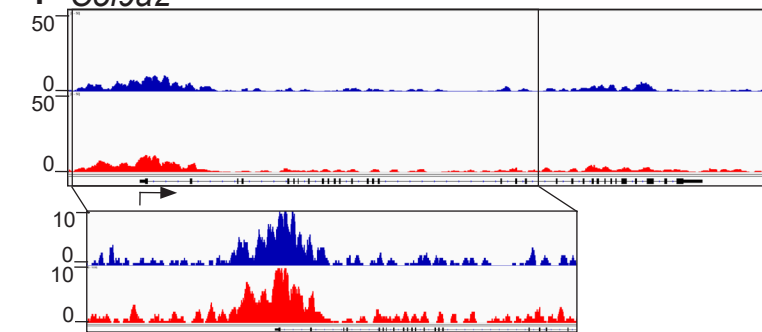

**B** *T*

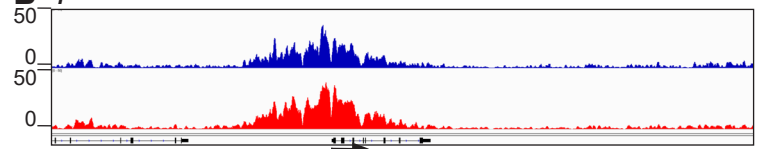

**D** *Axin2*

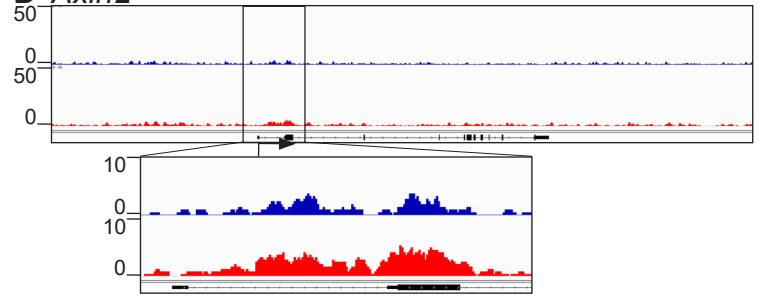

**F** *Twist2*

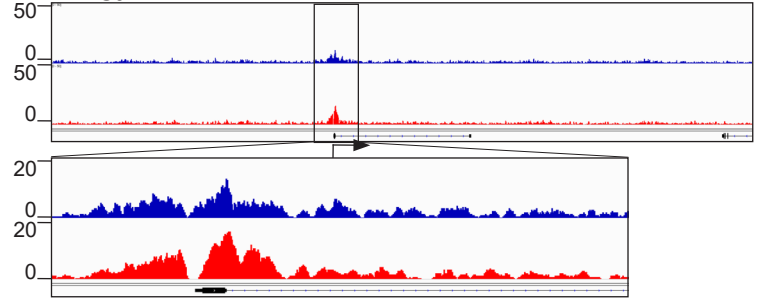

**H** *Col11a2*

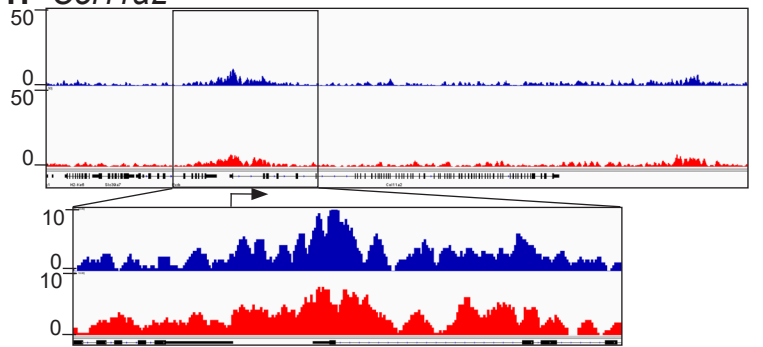

**J** *Mcm6*

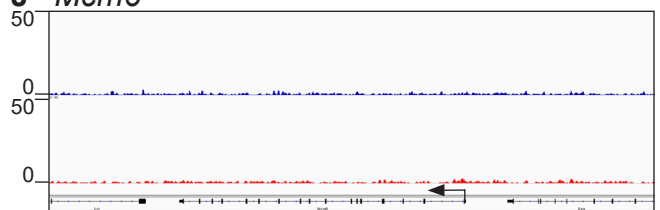

Table1

| INTERACTION                              | TISSUE                                       | TREATMENT                                                   | METHOD                                                           | BIOLOGICAL SIGNIFICANCE                                                                                                                                                         | AUTHOR                                                                  |
|------------------------------------------|----------------------------------------------|-------------------------------------------------------------|------------------------------------------------------------------|---------------------------------------------------------------------------------------------------------------------------------------------------------------------------------|-------------------------------------------------------------------------|
| $\beta$ -catenin and EZH2                | MCF-7 human breast cancer cells              | n/a                                                         | $\beta$ -catenin and EZH2 co-IP                                  | [do no show]                                                                                                                                                                    | Shi et al., Mol and Cell Bio 2007                                       |
| $\beta$ -catenin and EZH2                | 4-month old primary mouse mammary epithelium | EZH2 overexpression cassette injected into one cell zygotes | $\beta$ -catenin and EZH2 co-IP and immunohistochemistry         | EZH2 binds to $\beta$ -catenin and induces nuclear accumulation                                                                                                                 | Li et al., American J of Pathology 2009                                 |
| Wnt/ $\beta$ -catenin signaling and EZH2 | Mouse brown fat                              | adCre infected EZH2fl/fl in primary culture                 | qPCR (Wnts) and western blot ( $\beta$ -catenin), EZH2 ChIP-qPCR | EZH2 knockout leads to an up-regulation of Wnt1, 6, 10a, and 10b along with increased cytosolic $\beta$ -catenin. EZH2 binds to Wnt1, 6, 10a, and 10b, but not $\beta$ -catenin | Wang et al., Proceedings of National Academy of Science of the USA 2010 |
| $\beta$ -catenin and EZH2                | HeLa cells                                   | n/a                                                         | Co-IP                                                            | Enhances Wnt transactivation independent of EZH2 methylation activity                                                                                                           | Jung et al., Mol Cell 2013                                              |
| TCF3 affects EZH2 expression             | Zebrafish retina                             | Non-functional TCF3 transgene                               | EZH2 and Suz12 <i>in situ</i> hybridization                      | Decrease in EZH2 expression in zebrafish retina                                                                                                                                 | Aldiri et al., Development 2013)                                        |
| Wnt3a and H3K27me3                       | 4 day old chick limb bud micromass culture   | Addition of Wnt3a in culture                                | ChIP-qPCR                                                        | Addition of Wnt3a increased H3K27me3 enrichment on the <i>Sox9</i> promoter                                                                                                     | Kumar et al., Cell Reports 2014                                         |
| Wnt signaling and EZH2                   | 10T 1/2 cells                                | Addition of BMP4 in culture                                 | ChIP-qPCR                                                        | BMP4 induces EZH2 and H3K27me3 enrichment on Wnt6, Wnt10a, and Wnt10b                                                                                                           | Yi et al., Molecular Cell 2015                                          |
| Wnt signaling and EZH2                   | E10.5 mouse midbrain                         | Wnt1Cre;EZH2fl/fl                                           | E10.5 Wnt1Cre;EZH2fl/fl midbrains microarray and RT-qPCR         | Knockout of EZH2 in midbrain leads to an up-regulation of Wnt inhibitors DKK2 and Wif1                                                                                          | Zemke et al., BMC Biology 2015                                          |
| $\beta$ -catenin and Jarid2              | Mouse embryonic stem cells                   | Jarid2 <sup>-/-</sup>                                       | $\beta$ -catenin western blot                                    | Jarid2 <sup>-/-</sup> leads to reduced $\beta$ -catenin activity                                                                                                                | Landeira et al., Cell Reports 2015                                      |
| Wnt signaling and EZH2 and EZH1          | 3 day old tibial growth plate                | Col2Cre;EZH1/2fl/fl                                         | Microarray                                                       | Wnt signaling genes ( <i>Fzd6</i> , <i>Plcb1</i> , <i>Nfatc4</i> , <i>Wnt5a</i> ) are differentially expressed in deletion of EZH1/2.                                           | Liu et al., Nature Communications 2016                                  |
| Wnt signaling and EED                    | Neonatal tibial rib chondrocyte cultures     | Col2Cre;EEDfl/fl                                            | TopFlash and Wnt inhibitor                                       | EED knockout out increases Wnt3a responsiveness by TopFlash. Administration of Wnt inhibitor, C59, rescues EED knockout kyphosis phenotype.                                     | Mirzamohammadi et al., Nat Comm 2016                                    |
| $\beta$ -catenin and EZH2                | Mouse embryonic stem cells                   | n/a                                                         | multiple experiments                                             | EZH2 binds to $\beta$ -catenin and induces nuclear accumulation                                                                                                                 | Hoffmeyer et al., Cell Reports 2017                                     |
